# Supplementary material for: The interplay between structural perfectness and CO oxidation catalysis on aluminum, phosphorous and silicon complexes of corroles
Source: Royal Society of Chemistry journal article supplement (doi:10.1039/c8cp07372d), 2019-01-01
Supplement: c8cp07372d1.pdf [file c8cp07372d1.pdf]

## **Electronic Supplementary Information**

The interplay between structural perfectness and CO oxidation catalysis on aluminum, phosphorous, and silicon complexes of corroles

Afshan Mohajeri\* and Nasim Hassani

Department of Chemistry, College of Sciences, Shiraz University, Shiraz, Iran  
E-mail: amohajeri@shirazu.ac.ir.

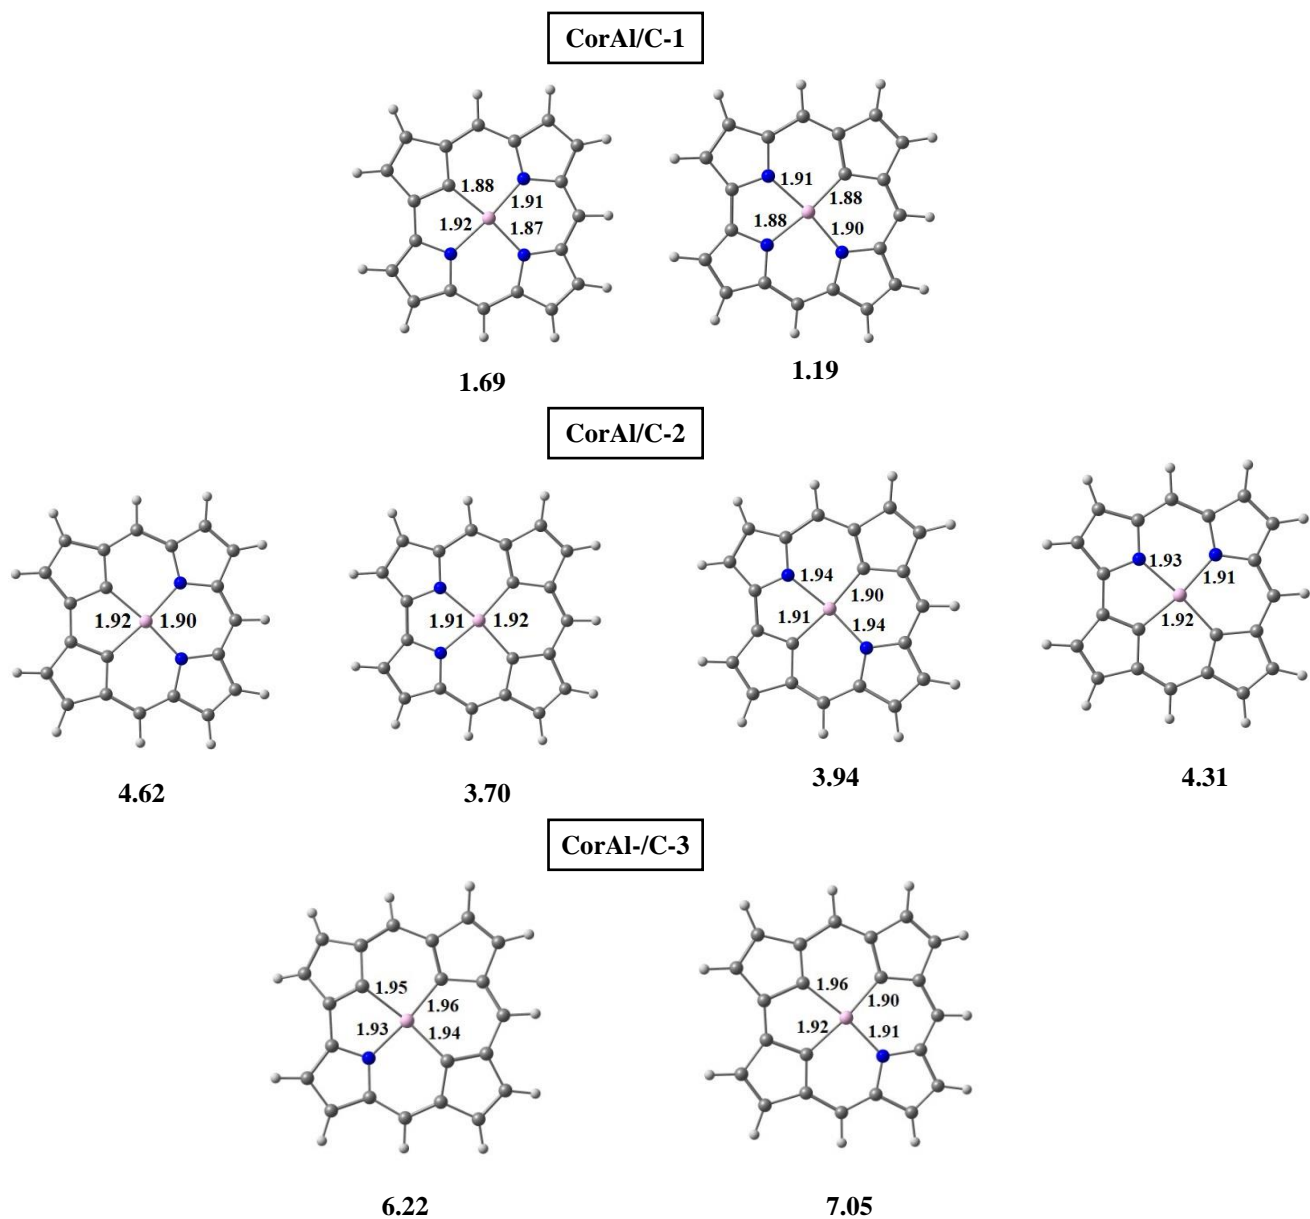

**Fig. S1** Different configurations of defective corrole of type CorAl/C- $x$ . The numbers are the defect formation energy in eV. In the figure, white, gray, dark blue, and pink balls represent H, C, N, and Al atoms.

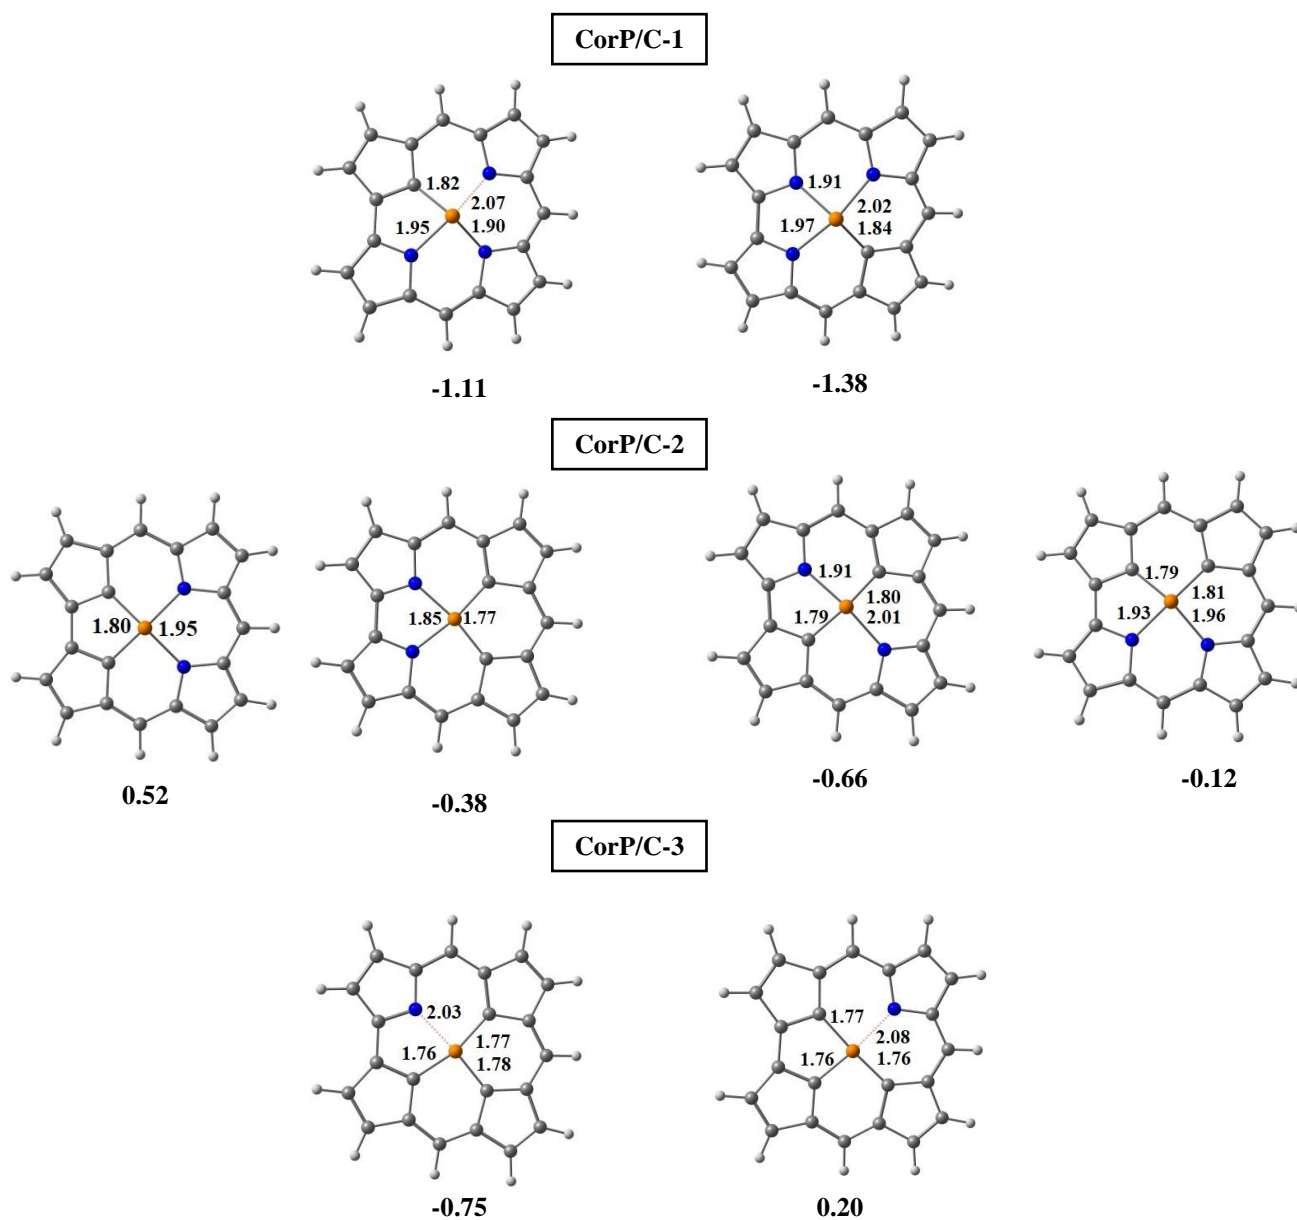

**Fig. S2** Different configurations of defective corrole of type CorP/C- $x$ . The numbers are the defect formation energy in eV. In the figure, white, gray, dark blue, and orange balls represent H, C, N, and P atoms.

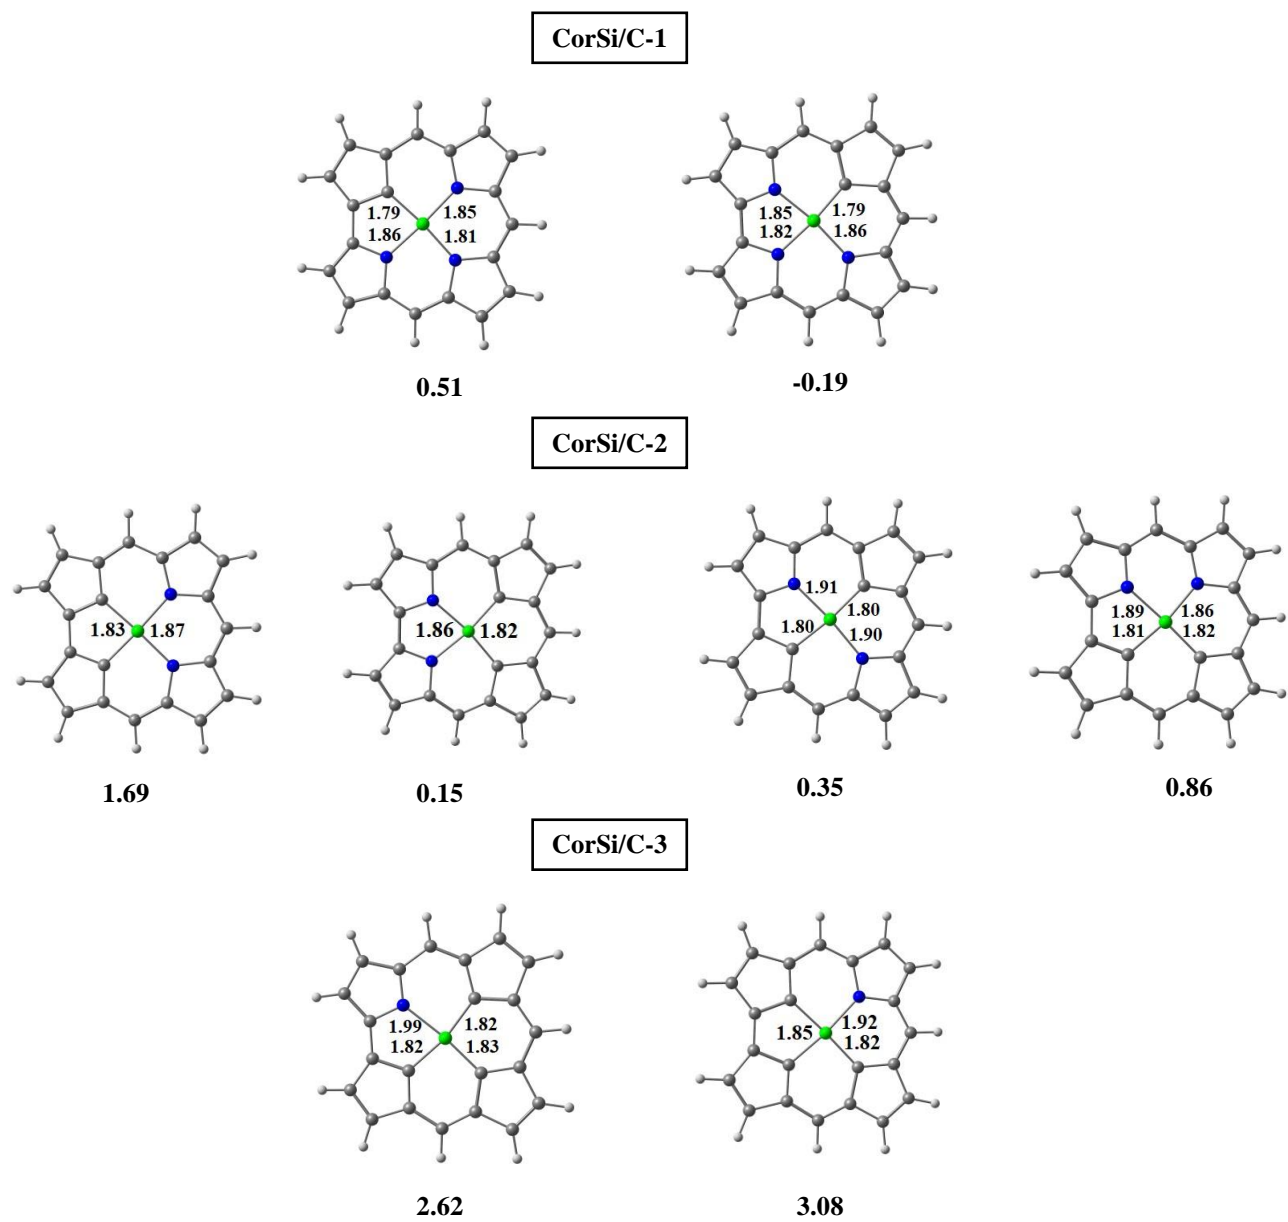

**Fig. S3** Different configurations of defective corrole of type CorSi/C- $x$ . The numbers are the defect formation energy in eV. In the figure, white, gray, dark blue, and green balls represent H, C, N, and Si atoms.

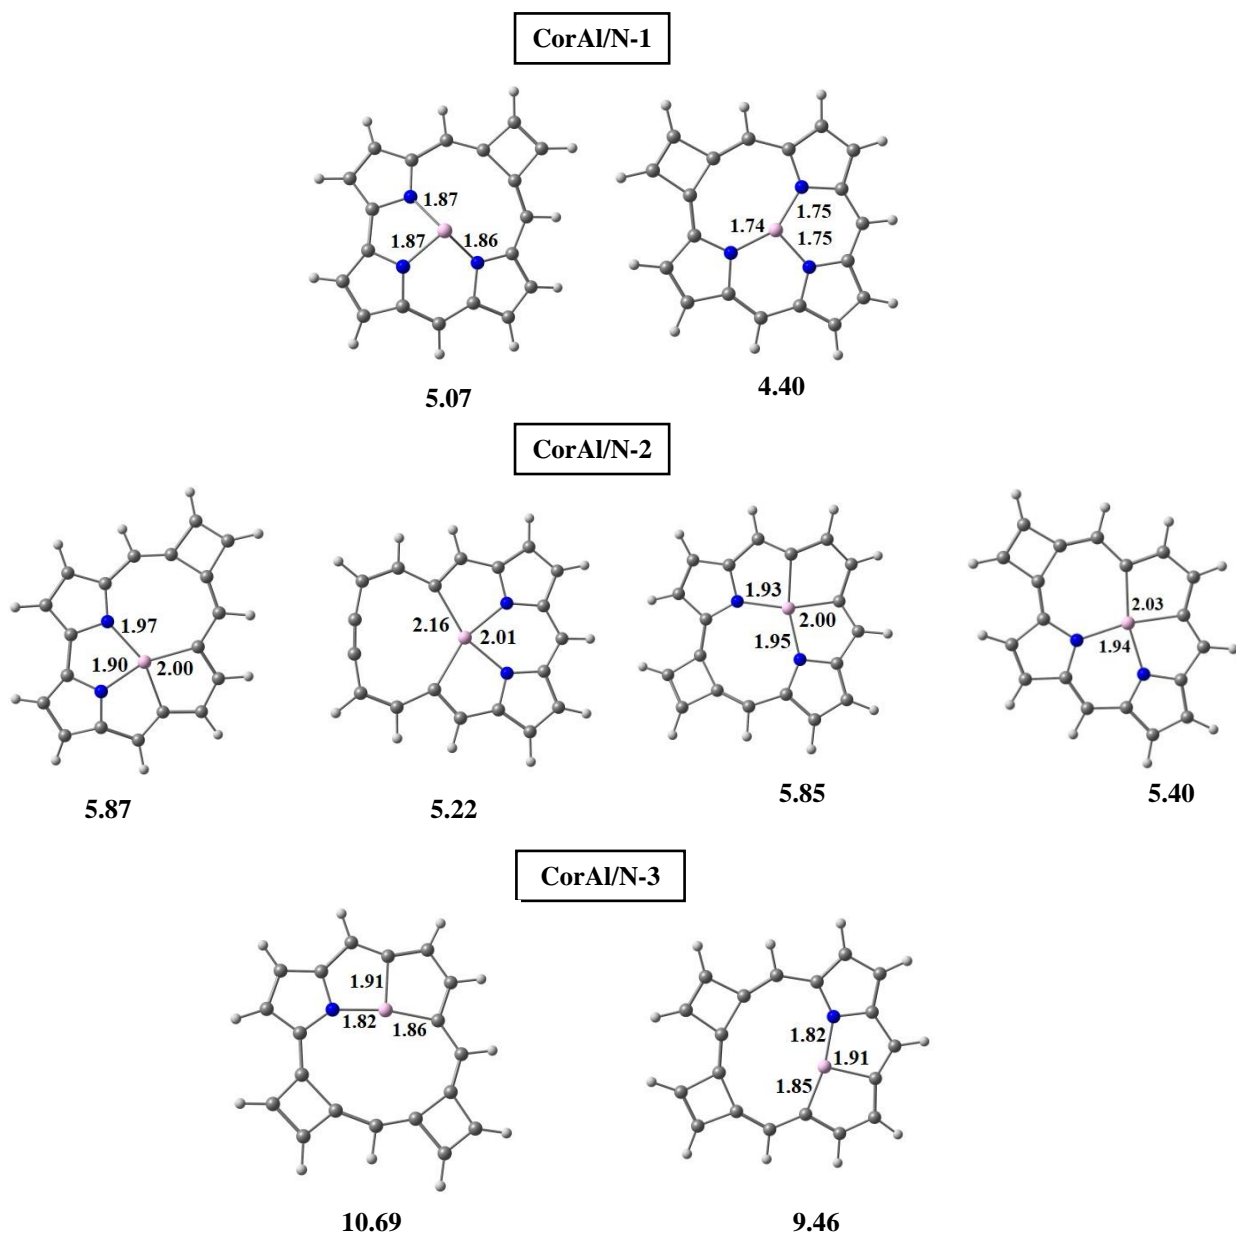

**Fig. S4** Different configurations of defective corrole of type CorAl/N- $x$ . The numbers are the vacancy formation energy in eV. In the figure, white, gray, dark blue, and pink balls represent H, C, N, and Al atoms.

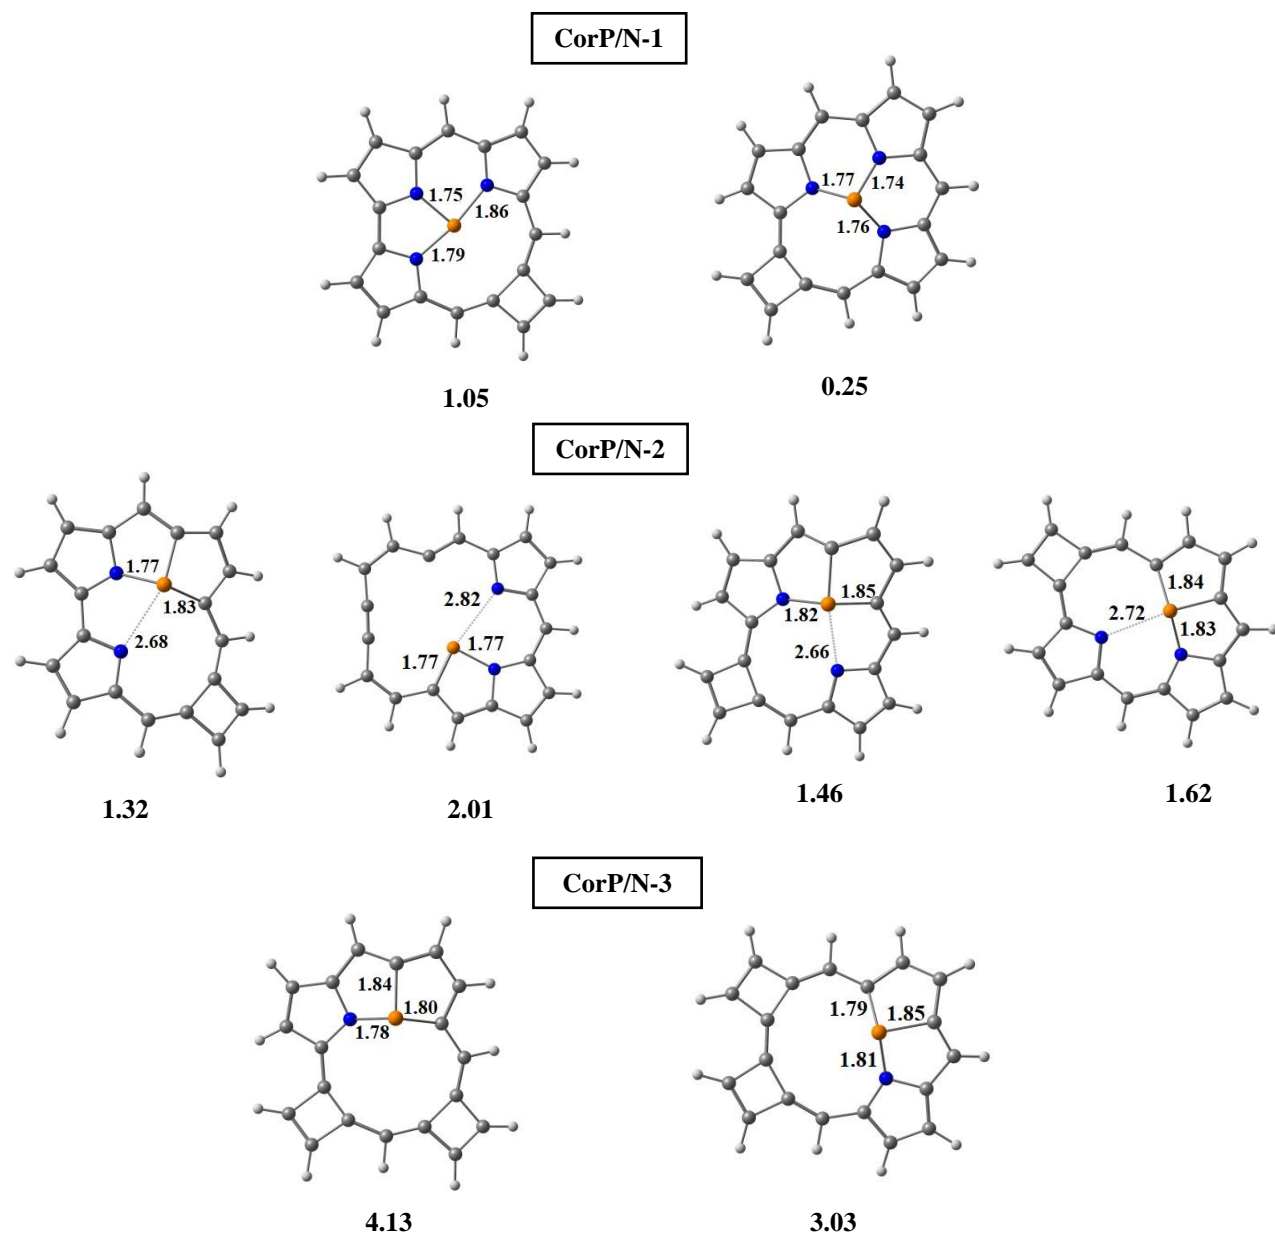

**Fig. S5** Different configurations of defective corrole of type CorP/N- $x$ . The numbers are the vacancy formation energy in eV. In the figure, white, gray, dark blue, and orange balls represent H, C, N, and P atoms.

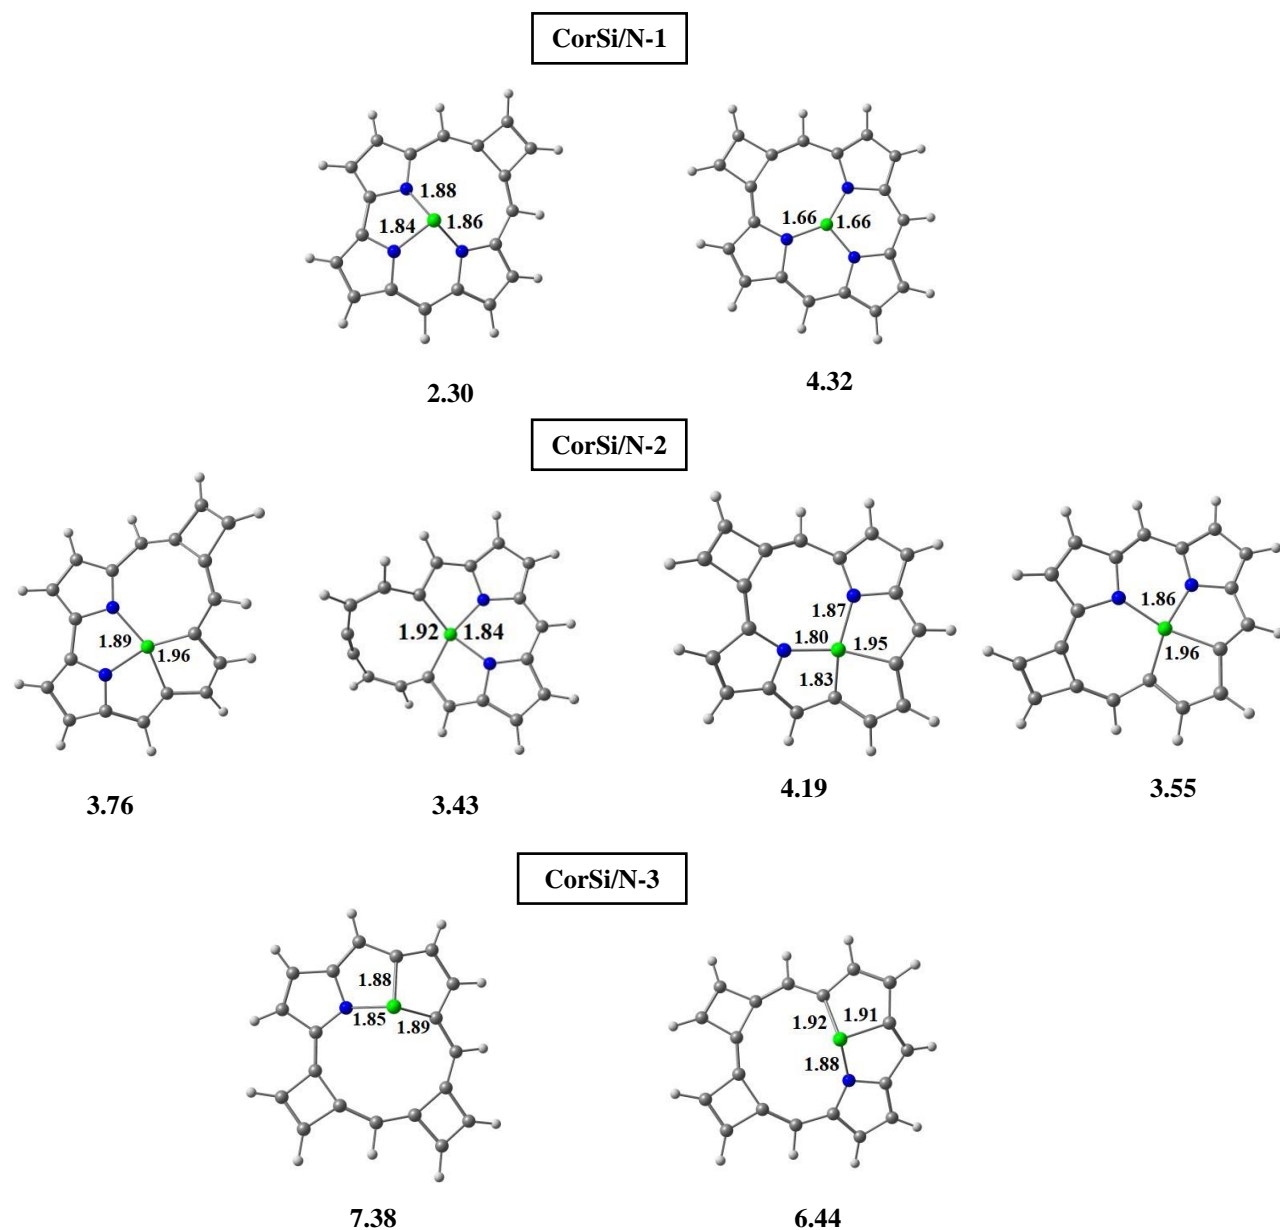

**Fig. S6** Different configurations of defective corrole of type CorSi/N- $x$ . The numbers are the vacancy formation energy in eV. In the figure, white, gray, dark blue, and green balls represent H, C, N, and Si atoms.

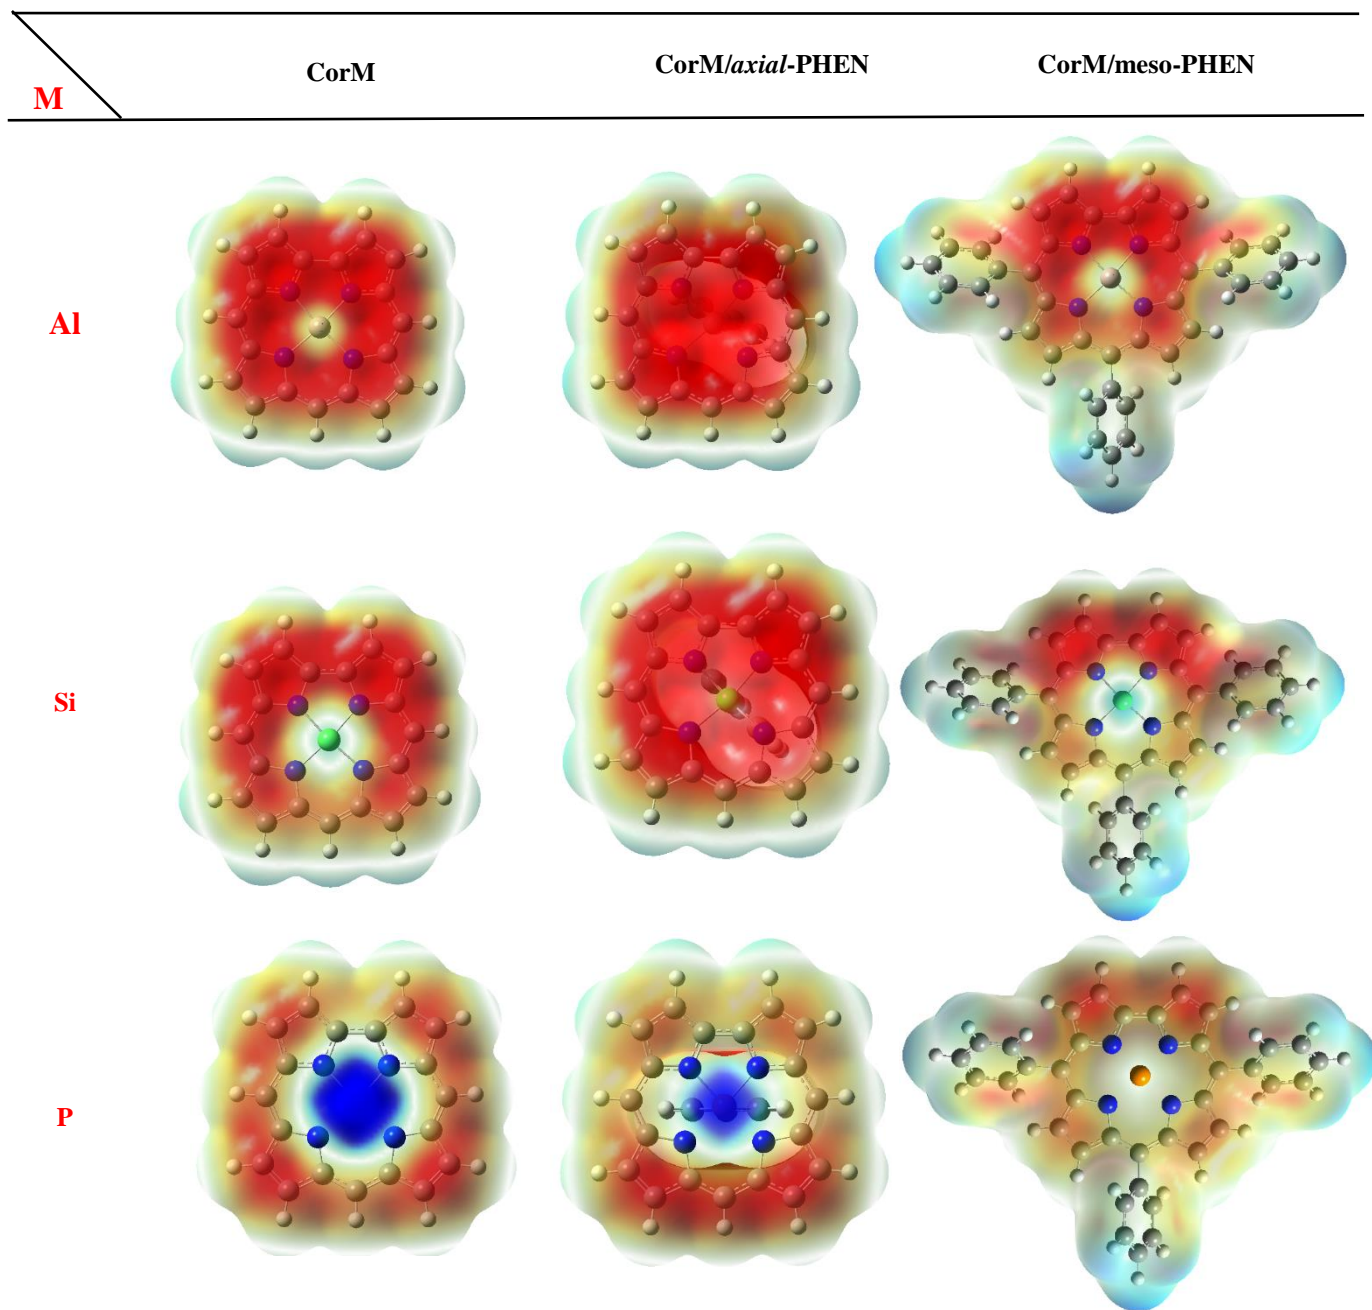

**Fig. S7** The molecular electrostatic potential isosurface (0.0004 au) for CorM, CorM/*axial*-PHEN and CorM/*meso*-PHEN molecules.



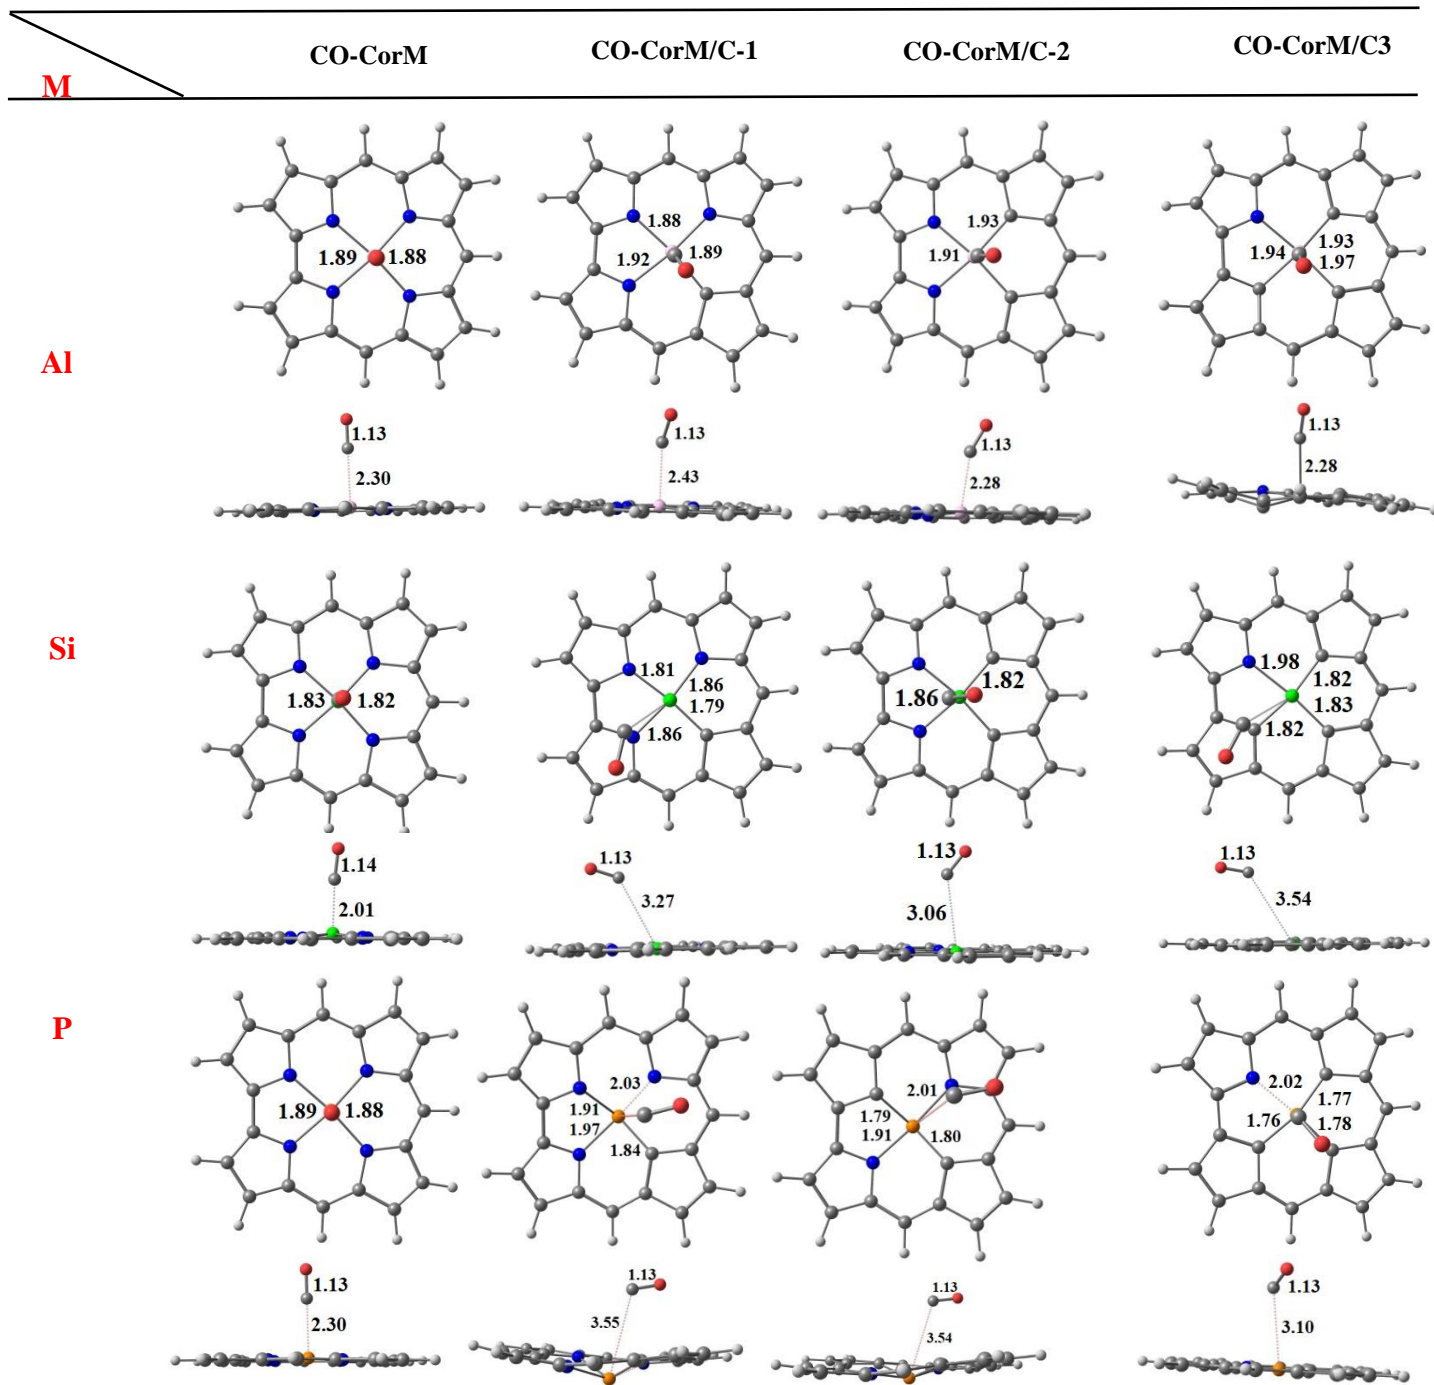

**Fig. S8** Top and side views for the most stable configurations for CO adsorption on the perfect and defective corroles of type CorM/C-*x* (C: Gray; O: Red; N: Blue; H: White; Al: Pink; Si: Green; P: Orange).

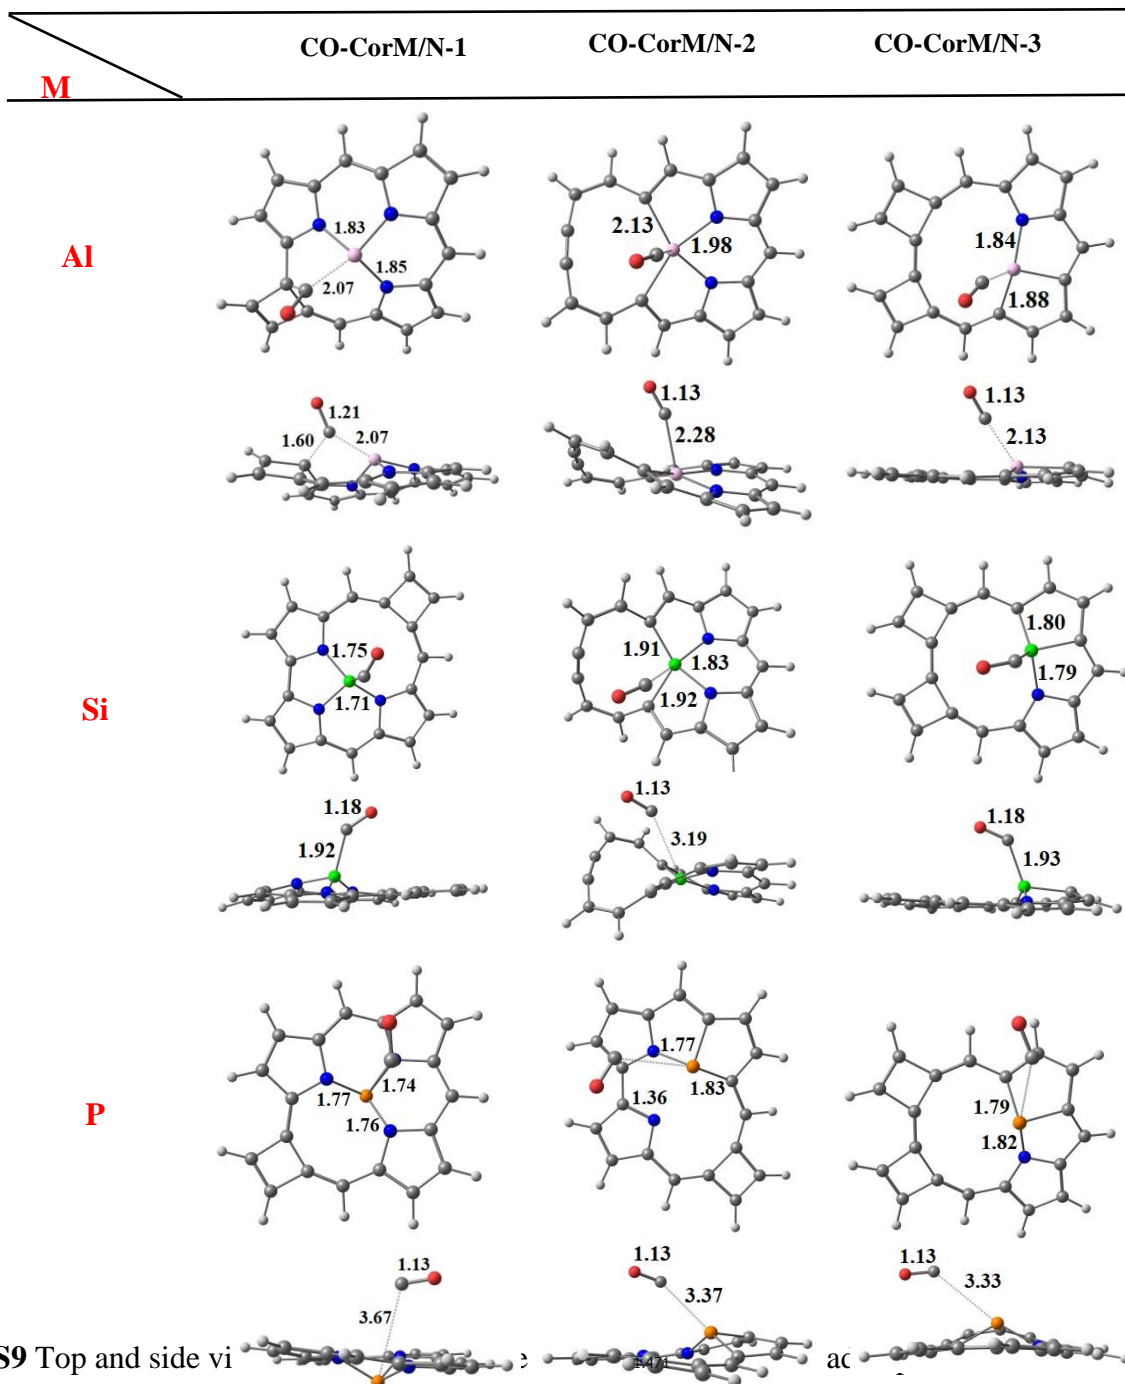

**Fig. S9** Top and side views of defective corroles of type CorM/N-*x* (C: Gray; O: Red; N: Blue; H: white; Al: Pink; Si: Green; P: Orange).

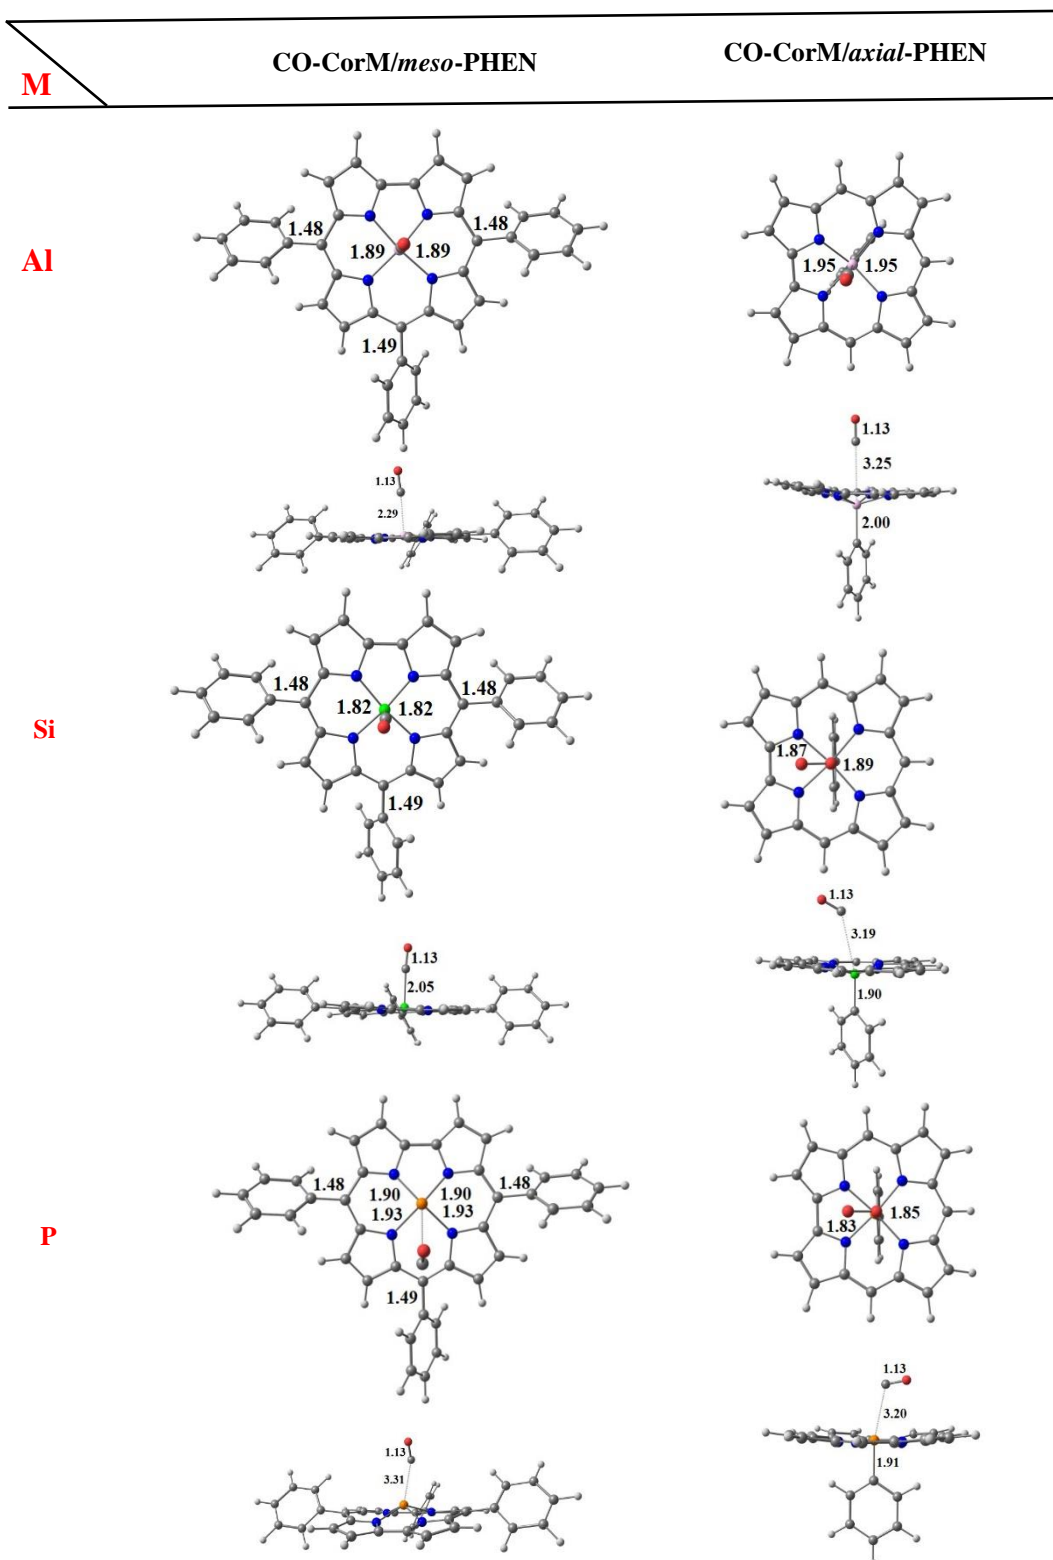

**Fig. S10** Top and side views for the most stable configurations for CO adsorption on the phenyl substituted CorMs (C: Gray; O: Red; N: Blue; H: White; Al: Pink; Si: Green; P: Orange).

**Table S1.** The relative energies (eV) of perfect corroles with different charges and spin states calculated by different DFT methods. **Bold** values show the ground spin state.

|              | (Charge, multiplicity) | M06-2X      | B3LYP       | PBE         | PBE0        |
|--------------|------------------------|-------------|-------------|-------------|-------------|
| <b>CorAl</b> | (3, 4)                 | 33.29       | 32.26       | 31.93       | 32.71       |
|              | (3, 2)                 | 31.91       | 30.98       | 31.00       | 31.40       |
|              | (2, 3)                 | 17.80       | 17.03       | 17.05       | 17.34       |
|              | (2, 1)                 | 17.72       | 17.09       | 17.10       | 17.41       |
|              | (1, 4)                 | 9.35        | 8.70        | 8.73        | 8.89        |
|              | (1, 2)                 | 7.37        | 6.94        | 6.98        | 7.12        |
|              | (0, 1)                 | 0.91        | 0.73        | 0.75        | 0.82        |
|              | (0, 3)                 | 2.70        | 2.42        | 2.44        | 2.50        |
|              | <b>(-1, 2)</b>         | <b>0.00</b> | <b>0.00</b> | <b>0.00</b> | <b>0.00</b> |
|              | (-1, 4)                | 1.82        | 1.71        | 1.77        | 1.67        |
|              | (-2, 1)                | 2.94        | 3.13        | 3.02        | 3.10        |
|              | (-2, 3)                | 3.09        | 3.21        | 3.17        | 3.15        |
|              | (-3, 2)                | 9.53        | 9.88        | 9.76        | 9.78        |
|              | (-3, 4)                | 10.96       | 10.38       | 10.89       | 10.22       |
| <b>CorP</b>  | (3, 4)                 | 32.50       | 31.43       | 29.89       | 3.30        |
|              | (3, 2)                 | 31.49       | 30.81       | 29.30       | 29.59       |
|              | (2, 3)                 | 17.60       | 16.92       | 15.50       | 15.75       |
|              | (2, 1)                 | 17.20       | 16.77       | 15.24       | 15.45       |
|              | (1, 4)                 | 9.18        | 8.67        | 7.26        | 7.38        |
|              | (1, 2)                 | 7.12        | 6.71        | 5.30        | 5.44        |
|              | (0, 1)                 | 0.99        | 0.80        | 0.59        | 0.52        |
|              | (0, 3)                 | 2.39        | 2.29        | 0.83        | 0.90        |
|              | <b>(-1, 2)</b>         | <b>0.00</b> | <b>0.00</b> | <b>0.00</b> | <b>0.00</b> |
|              | (-1, 4)                | 1.56        | 1.45        | 0.62        | 0.43        |
|              | (-2, 1)                | 2.88        | 3.07        | 1.58        | 1.63        |
|              | (-2, 3)                | 4.57        | 4.49        | 1.74        | 2.99        |
|              | (-3, 2)                | 11.05       | 9.82        | 8.27        | 9.55        |
|              | (-3, 4)                | 11.08       | 11.14       | 8.80        | 9.58        |
| <b>CorSi</b> | (3, 3)                 | 30.57       | 29.68       | 29.71       | 29.57       |
|              | (3, 1)                 | 30.67       | 29.88       | 29.78       | 29.79       |
|              | (2, 4)                 | 17.31       | 17.54       | 17.57       | 17.31       |
|              | (2, 2)                 | 16.27       | 15.71       | 15.78       | 15.48       |
|              | (1, 3)                 | 7.84        | 7.43        | 7.41        | 7.09        |
|              | (1, 1)                 | 5.72        | 5.45        | 5.53        | 5.11        |
|              | (0, 2)                 | 1.11        | 1.02        | 1.07        | 0.58        |
|              | (0, 4)                 | 3.27        | 2.99        | 2.61        | 2.54        |
|              | <b>(-1, 1)</b>         | <b>0.00</b> | <b>0.00</b> | <b>0.00</b> | <b>0.00</b> |
|              | (-1, 3)                | 0.28        | 0.48        | 0.44        | 0.32        |
|              | (-2, 2)                | 3.41        | 3.07        | 2.99        | 2.50        |
|              | (-2, 4)                | 3.05        | 3.16        | 3.13        | 2.58        |
|              | (-3, 1)                | 10.21       | 9.30        | 9.14        | 8.86        |
|              | (-3, 3)                | 9.50        | 9.83        | 9.73        | 9.22        |

**Table S2..** The relative energy (eV) of different structures for defected corroles with charge -1 and different spin states calculated by different DFT methods. Latin numbers refer to the geometrical isomers shown in Figs. S1- S6. **Bold** values show the ground spin state.

|                  |            | (Charge, multiplicity) | M06-2X      | B3LYP       | PBE         | PBE0        |
|------------------|------------|------------------------|-------------|-------------|-------------|-------------|
| <b>CorAl/C-1</b> | <b>I</b>   | (-1, 1)                | 0.52        | 0.50        | 0.47        | 0.50        |
|                  |            | (-1, 3)                | 1.98        | 1.65        | 1.79        | 1.43        |
|                  | <b>II</b>  | <b>(-1, 1)</b>         | <b>0.00</b> | <b>0.00</b> | <b>0.00</b> | <b>0.00</b> |
|                  |            | (-1, 3)                | 1.38        | 1.68        | 1.40        | 1.29        |
| <b>CorAl/C-2</b> | <b>I</b>   | (-1, 2)                | 0.94        | 0.74        | 0.65        | 0.78        |
|                  |            | (-1, 4)                | 2.41        | 2.16        | 2.02        | 2.13        |
|                  | <b>II</b>  | <b>(-1, 2)</b>         | <b>0.00</b> | <b>0.00</b> | <b>0.00</b> | <b>0.00</b> |
|                  |            | (-1, 4)                | 1.95        | 2.65        | 1.71        | 1.68        |
|                  | <b>III</b> | (-1, 2)                | 0.24        | 0.22        | 0.17        | 0.23        |
|                  |            | (-1, 4)                | 1.85        | 2.54        | 1.58        | 1.58        |
|                  | <b>IV</b>  | (-1, 2)                | 0.61        | 0.56        | 0.48        | 0.58        |
|                  |            | (-1, 4)                | 2.09        | 2.31        | 1.88        | 1.85        |
| <b>CorAl/C-3</b> | <b>I</b>   | <b>(-1, 1)</b>         | <b>0.00</b> | <b>0.00</b> | <b>0.00</b> | <b>0.00</b> |
|                  |            | (-1, 3)                | 0.82        | 1.17        | 0.61        | 0.54        |
|                  | <b>II</b>  | (-1, 1)                | 0.85        | 0.70        | 0.75        | 0.76        |
|                  |            | (-1, 3)                | 0.98        | 1.59        | 0.71        | 0.65        |
| <b>CorAl/N-1</b> | <b>I</b>   | (-1, 1)                | 0.62        | 0.49        | 0.63        | 0.51        |
|                  |            | (-1, 3)                | 0.74        | 1.53        | 1.00        | 0.95        |
|                  | <b>II</b>  | <b>(-1, 1)</b>         | <b>0.00</b> | <b>0.00</b> | <b>0.00</b> | <b>0.00</b> |
|                  |            | (-1, 3)                | 0.73        | 0.50        | 0.33        | 0.38        |
| <b>CorAl/N-2</b> | <b>I</b>   | (-1, 2)                | 1.89        | 3.39        | 1.57        | 3.43        |
|                  |            | (-1, 4)                | 3.39        | 4.06        | 3.19        | 3.51        |
|                  | <b>II</b>  | <b>(-1, 2)</b>         | <b>0.00</b> | <b>0.00</b> | <b>0.00</b> | <b>0.00</b> |
|                  |            | (-1, 4)                | 1.22        | 1.99        | 1.02        | 0.97        |
|                  | <b>III</b> | (-1, 2)                | 0.54        | 0.71        | 0.84        | 0.53        |
|                  |            | (-1, 4)                | 2.73        | 3.99        | 3.14        | 3.17        |
|                  | <b>IV</b>  | (-1, 2)                | 0.09        | 0.14        | 0.07        | 0.16        |
|                  |            | (-1, 4)                | 1.98        | 2.67        | 1.74        | 1.92        |
| <b>CorAl/N-3</b> | <b>I</b>   | (-1, 1)                | 1.45        | 1.31        | 1.18        | 1.63        |
|                  |            | <b>(-1, 3)</b>         | <b>0.00</b> | <b>0.00</b> | <b>0.00</b> | <b>0.00</b> |
|                  | <b>II</b>  | (-1, 1)                | 0.43        | 0.23        | 0.29        | 0.35        |
|                  |            | (-1, 3)                | 0.67        | 0.63        | 0.52        | 0.72        |
| <b>CorSi/C-1</b> | <b>I</b>   | (-1, 2)                | 0.70        | 0.65        | 0.60        | 0.67        |

|                  |            |                |             |             |             |             |
|------------------|------------|----------------|-------------|-------------|-------------|-------------|
|                  |            | (-1, 4)        | 2.64        | 2.40        | 2.31        | 2.44        |
|                  | <b>II</b>  | <b>(-1, 2)</b> | <b>0.00</b> | <b>0.00</b> | <b>0.00</b> | <b>0.00</b> |
| <b>CorSi/C-2</b> |            | (-1, 4)        | 2.29        | 2.10        | 2.08        | 2.07        |
|                  | <b>I</b>   | (-1, 1)        | 1.58        | 1.47        | 1.36        | 1.49        |
|                  |            | (-1, 3)        | 3.24        | 3.16        | 2.37        | 3.16        |
|                  | <b>II</b>  | <b>(-1, 1)</b> | <b>0.00</b> | <b>0.00</b> | <b>0.00</b> | <b>0.00</b> |
|                  | <b>II</b>  | (-1, 3)        | 2.09        | 1.92        | 1.88        | 1.91        |
|                  | <b>III</b> | (-1, 1)        | 0.22        | 0.16        | 0.13        | 0.17        |
|                  |            | (-1, 3)        | 1.99        | 1.79        | 1.73        | 1.80        |
|                  | <b>IV</b>  | (-1, 1)        | 0.73        | 0.66        | 0.60        | 0.67        |
| <b>CorSi/C-3</b> |            | (-1, 3)        | 2.37        | 2.19        | 2.15        | 2.20        |
|                  | <b>I</b>   | <b>(-1, 2)</b> | <b>0.00</b> | <b>0.00</b> | <b>0.00</b> | <b>0.00</b> |
|                  |            | (-1, 4)        | 2.09        | 1.81        | 1.74        | 1.80        |
|                  | <b>II</b>  | (-1, 2)        | 0.45        | 0.34        | 0.28        | 0.33        |
| <b>CorSi/N-1</b> |            | (-1, 4)        | 2.24        | 1.96        | 1.91        | 1.92        |
|                  | <b>I</b>   | <b>(-1, 2)</b> | <b>0.00</b> | <b>0.00</b> | <b>0.00</b> | <b>0.00</b> |
|                  |            | (-1, 4)        | 2.42        | 2.99        | 2.73        | 2.77        |
|                  | <b>II</b>  | (-1, 2)        | 0.51        | 0.44        | 0.46        | 0.41        |
| <b>CorSi/N-2</b> |            | (-1, 4)        | 1.01        | 1.21        | 1.20        | 1.17        |
|                  | <b>I</b>   | (-1, 1)        | 0.30        | 0.43        | 0.38        | 0.27        |
|                  |            | (-1, 3)        | 0.96        | 0.82        | 0.72        | 0.65        |
|                  | <b>II</b>  | <b>(-1, 1)</b> | <b>0.00</b> | <b>0.00</b> | <b>0.00</b> | <b>0.00</b> |
|                  | <b>II</b>  | (-1, 3)        | 1.30        | 1.08        | 1.10        | 1.21        |
|                  | <b>III</b> | (-1, 1)        | 0.77        | 0.73        | 0.55        | 0.63        |
|                  |            | (-1, 3)        | 1.06        | 0.93        | 0.85        | 0.77        |
|                  | <b>IV</b>  | (-1, 1)        | 0.11        | 0.11        | 0.13        | 0.11        |
| <b>CorSi/N-3</b> |            | (-1, 3)        | 0.71        | 0.51        | 0.40        | 0.36        |
|                  | <b>I</b>   | (-1, 2)        | 0.98        | 0.80        | 0.70        | 0.79        |
|                  |            | (-1, 4)        | 1.52        | 1.28        | 1.26        | 1.24        |
|                  | <b>II</b>  | <b>(-1, 2)</b> | <b>0.00</b> | <b>0.00</b> | <b>0.00</b> | <b>0.00</b> |
|                  |            | (-1, 4)        | 1.57        | 1.69        | 1.57        | 1.55        |
| <b>CorP/C-1</b>  |            | (-1, 1)        | 0.28        | 0.27        | 0.25        | 0.27        |
|                  | <b>I</b>   | (-1, 3)        | 1.31        | 1.61        | 1.17        | 1.57        |
|                  | <b>II</b>  | <b>(-1, 1)</b> | <b>0.00</b> | <b>0.00</b> | <b>0.00</b> | <b>0.00</b> |
| <b>CorP/C-2</b>  |            | (-1, 3)        | 0.74        | 0.73        | 0.74        | 0.62        |
|                  | <b>I</b>   | (-1, 2)        | 1.20        | 1.14        | 1.06        | 1.17        |
|                  |            | (-1, 4)        | 2.60        | 2.28        | 2.21        | 2.33        |

|                 |     |                |             |             |             |             |
|-----------------|-----|----------------|-------------|-------------|-------------|-------------|
|                 |     | (-1, 2)        | 0.31        | 0.38        | 0.33        | 0.30        |
|                 | II  | (-1, 4)        | 2.54        | 1.93        | 1.92        | 1.96        |
|                 |     | <b>(-1, 2)</b> | <b>0.00</b> | <b>0.00</b> | <b>0.00</b> | <b>0.00</b> |
|                 | III | (-1, 4)        | 1.77        | 1.62        | 1.62        | 1.63        |
|                 |     | (-1, 2)        | 0.54        | 0.48        | 0.44        | 0.51        |
|                 | IV  | (-1, 4)        | 2.26        | 2.04        | 2.03        | 2.08        |
| <b>CorP/C-3</b> |     | <b>(-1, 1)</b> | <b>0.00</b> | <b>0.00</b> | <b>0.00</b> | <b>0.00</b> |
|                 | I   | (-1, 3)        | 1.90        | 1.72        | 1.69        | 1.74        |
|                 |     | (-1, 1)        | 0.90        | 0.86        | 0.80        | 0.88        |
|                 | II  | (-1, 3)        | 2.35        | 2.13        | 2.03        | 2.14        |
| <b>CorP/N-1</b> |     | (-1, 1)        | 0.84        | 0.87        | 0.62        | 0.85        |
|                 | I   | (-1, 3)        | 1.27        | 1.25        | 1.18        | 1.21        |
|                 |     | <b>(-1, 1)</b> | <b>0.00</b> | <b>0.00</b> | <b>0.00</b> | <b>0.00</b> |
|                 | II  | (-1, 3)        | 1.24        | 0.71        | 0.69        | 0.68        |
| <b>CorP/N-2</b> |     | <b>(-1, 2)</b> | <b>0.00</b> | <b>0.00</b> | <b>0.00</b> | <b>0.00</b> |
|                 | I   | (-1, 4)        | 2.11        | 1.89        | 1.84        | 1.85        |
|                 |     | (-1, 2)        | 0.75        | 0.59        | 0.65        | 0.73        |
|                 | II  | (-1, 4)        | 2.08        | 1.69        | 2.04        | 2.19        |
|                 |     | (-1, 2)        | 0.17        | 0.17        | 0.19        | 0.18        |
|                 | III | (-1, 4)        | 2.04        | 1.74        | 1.64        | 1.74        |
|                 |     | (-1, 2)        | 0.33        | 0.22        | 0.18        | 0.26        |
|                 | IV  | (-1, 4)        | 1.66        | 1.37        | 1.33        | 1.42        |
| <b>CorP/N-3</b> |     | (-1, 1)        | 1.16        | 1.12        | 0.97        | 1.00        |
|                 | I   | (-1, 3)        | 1.36        | 1.10        | 1.06        | 1.06        |
|                 |     | <b>(-1, 1)</b> | <b>0.00</b> | <b>0.00</b> | <b>0.00</b> | <b>0.00</b> |
|                 | II  | (-1, 3)        | 1.33        | 1.13        | 1.09        | 1.16        |

**Table S3.** Adsorption energy (eV) of C-end on and O-end on configurations of CO with different charge and multiplicities on perfect and defective CorMs at M062X/6-31G(d) level.

|                  | (Charge, multiplicity) | CO           | OC    |
|------------------|------------------------|--------------|-------|
| <b>CorAl</b>     | (-1, 1)                | <b>-0.38</b> | -0.27 |
|                  | (-1, 3)                | 1.31         | 1.59  |
| <b>CorAl/C-1</b> | (-1, 2)                | <b>-0.27</b> | -0.23 |
|                  | (-1, 4)                | 0.93         | -0.01 |
| <b>CorAl/C-2</b> | (-1, 1)                | <b>-0.34</b> | -0.16 |
|                  | (-1, 3)                | 1.55         | 1.78  |
| <b>CorAl/C-3</b> | (-1, 1)                | <b>-0.24</b> | 0.19  |
|                  | (-1, 3)                | 0.44         | 0.67  |
| <b>CorAl/N-1</b> | (-1, 1)                | <b>-1.02</b> | -0.92 |
|                  | (-1, 3)                | -0.84        | -0.49 |
| <b>CorAl/N-2</b> | (-1, 2)                | <b>-0.31</b> | -0.27 |
|                  | (-1, 4)                | 1.58         | 1.73  |
| <b>CorAl/N-3</b> | (-1, 1)                | <b>-0.60</b> | -0.31 |
|                  | (-1, 3)                | -0.13        | 0.15  |
| -----            |                        |              |       |
| <b>CorSi</b>     | (-1, 1)                | <b>-0.40</b> | -0.13 |
|                  | (-1, 3)                | -1.13        | -0.26 |
| <b>CorSi/C-1</b> | (-1, 2)                | <b>-0.22</b> | 0.34  |
|                  | (-1, 4)                | 1.09         | 2.00  |
| <b>CorSi/C-2</b> | (-1, 1)                | <b>-0.14</b> | 0.07  |
|                  | (-1, 3)                | 1.73         | 1.85  |
| <b>CorSi/C-3</b> | (-1, 2)                | <b>-0.19</b> | -0.06 |
|                  | (-1, 4)                | 1.80         | 2.66  |
| <b>CorSi/N-1</b> | (-1, 2)                | <b>0.69</b>  | 1.68  |
|                  | (-1, 4)                | 1.13         | 3.04  |
| <b>CorSi/N-2</b> | (-1, 1)                | <b>-0.24</b> | -0.19 |
|                  | (-1, 3)                | 0.99         | 1.02  |
| <b>CorSi/N-3</b> | (-1, 2)                | <b>0.05</b>  | 1.08  |
|                  | (-1, 4)                | 0.10         | 2.13  |
| -----            |                        |              |       |
| <b>CorP</b>      | (-1, 2)                | <b>-0.22</b> | -0.16 |
|                  | (-1, 4)                | -0.19        | -0.10 |
| <b>CorP/C-1</b>  | (-1, 1)                | <b>-0.21</b> | 0.05  |
|                  | (-1, 3)                | 0.53         | 0.54  |
| <b>CorP/C-2</b>  | (-1, 2)                | <b>-0.19</b> | -0.15 |
|                  | (-1, 4)                | 1.57         | 1.57  |



---

|                 |         |              |       |
|-----------------|---------|--------------|-------|
| <b>CorP/C-3</b> | (-1, 1) | <b>-0.03</b> | 0.10  |
|                 | (-1, 3) | 1.71         | 1.71  |
| <b>CorP/N-1</b> | (-1, 1) | <b>-0.21</b> | -0.18 |
|                 | (-1, 3) | 0.63         | 0.64  |
| <b>CorP/N-2</b> | (-1, 2) | <b>-0.18</b> | -0.15 |
|                 | (-1, 4) | 1.96         | 1.89  |
| <b>CorP/N-3</b> | (-1, 1) | <b>-0.17</b> | -0.12 |
|                 | (-1, 3) | 1.15         | 1.15  |

---

**Table S4.** Adsorption energy (eV) of end-on and side-on configurations of O<sub>2</sub> with different charge and multiplicities on perfect and defective CorMs at M062X/6-31G(d) level.

|                  | (Charge, multiplicity) | End-on       | Side-on      |
|------------------|------------------------|--------------|--------------|
| <b>CorAl</b>     | (-1, 2)                | <b>-2.11</b> | –            |
|                  | (-1, 4)                | -0.73        | –            |
| <b>CorAl/C-1</b> | (-1, 1)                | 0.51         | <b>-1.40</b> |
|                  | (-1, 3)                | -0.67        | -0.49        |
| <b>CorAl/C-2</b> | (-1, 2)                | <b>-0.65</b> | –            |
|                  | (-1, 4)                | 0.04         | –            |
| <b>CorAl/C-3</b> | (-1, 1)                | –            | <b>-1.84</b> |
|                  | (-1, 3)                | 0.00         | -1.01        |
| <b>CorAl/N-1</b> | (-1, 1)                | <b>-3.44</b> | –            |
|                  | (-1, 3)                | -3.24        | –            |
| <b>CorAl/N-2</b> | (-1, 2)                | <b>-1.47</b> | -1.31        |
|                  | (-1, 4)                | -0.32        | -0.28        |
| <b>CorAl/N-3</b> | (-1, 1)                | –            | <b>-3.70</b> |
|                  | (-1, 3)                | –            | -2.67        |
| <hr/>            |                        |              |              |
| <b>CorSi</b>     | (-1, 1)                | <b>-3.92</b> | -3.37        |
|                  | (-1, 3)                | -3.16        | -1.73        |
| <b>CorSi/C-1</b> | (-1, 2)                | <b>-2.24</b> | -1.88        |
|                  | (-1, 4)                | -0.93        | 0.00         |
| <b>CorSi/C-2</b> | (-1, 1)                | –            | -0.09        |
|                  | (-1, 3)                | <b>-0.49</b> | 0.73         |
| <b>CorSi/C-3</b> | (-1, 2)                | <b>-0.64</b> | –            |
|                  | (-1, 4)                | -0.28        | –            |
| <b>CorSi/N-1</b> | (-1, 2)                | –            | <b>-3.60</b> |
|                  | (-1, 4)                | -0.29        | -1.49        |
| <b>CorSi/N-2</b> | (-1, 1)                | <b>-2.16</b> | -1.96        |
|                  | (-1, 3)                | –            | –            |
| <b>CorSi/N-3</b> | (-1, 2)                | -1.17        | <b>-1.79</b> |
|                  | (-1, 4)                | -0.55        | -0.75        |
| <hr/>            |                        |              |              |
| <b>CorP</b>      | (-1, 2)                | <b>-2.11</b> | -1.03        |
|                  | (-1, 4)                | -1.72        | -0.84        |
| <b>CorP/C-1</b>  | (-1, 1)                | <b>-0.89</b> | -1.00        |
|                  | (-1, 3)                | -0.07        | -0.52        |
| <b>CorP/C-2</b>  | (-1, 2)                | <b>-1.15</b> | -0.98        |
|                  | (-1, 4)                | 1.32         | 0.4          |

|                 |         |       |              |
|-----------------|---------|-------|--------------|
| <b>CorP/C-3</b> | (-1, 1) | –     | <b>1.02</b>  |
|                 | (-1, 3) | –     | 1.68         |
| <b>CorP/N-1</b> | (-1, 1) | –     | <b>-1.78</b> |
|                 | (-1, 3) | –     | -1.04        |
| <b>CorP/N-2</b> | (-1, 2) | -0.09 | <b>-0.72</b> |
|                 | (-1, 4) | 0.65  | 1.14         |
| <b>CorP/N-3</b> | (-1, 1) | –     | <b>-1.79</b> |
|                 | (-1, 3) | 0.29  | 0.27         |
